# Supplementary material
Source: Springer Nature journal article supplement (https://www.springermedizin.de/resource/supplementary/12990_2010_327_MOESM2_ESM.pdf/9613040)

**A****Aqua-glyceroporins****Aquaporins**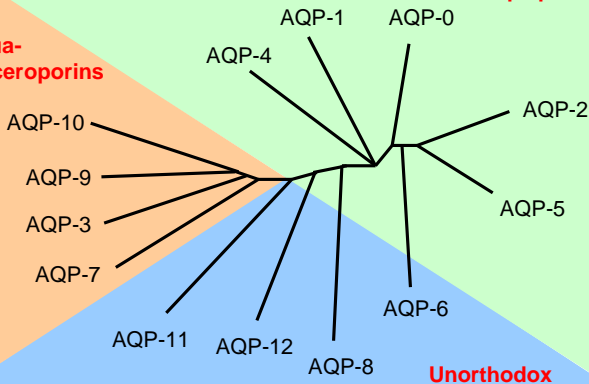**B**

Extracellular

Membrane

Intracellular

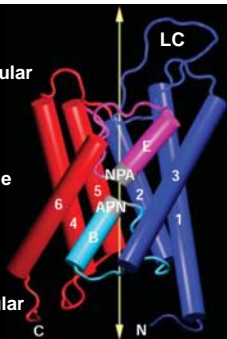**C**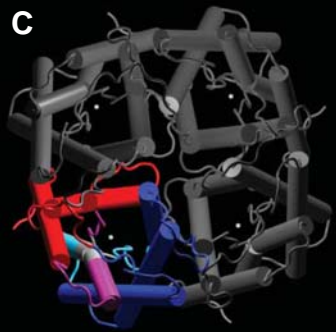

Supplement: MOESM2 [file 9613040]
